# Supplementary material
Source: Springer Nature journal article supplement (https://www.springermedizin.de/resource/supplementary/12936_2014_3176_MOESM3_ESM.pdf/9545226)
Supplement: MOESM3 [file 9545226]

Health Facilities

Community Health Worker

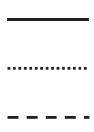

Passive testing of self-reporting patients

Active testing of residents during monthly household visits

PROPORTION OF CATCHMENT POPULATION TESTED (%)

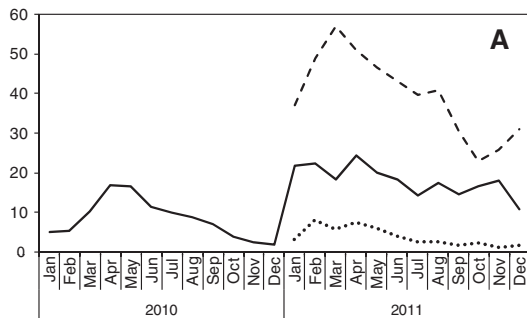

PROPORTION DIAGNOSED AMONG POPULATION TESTED (%)

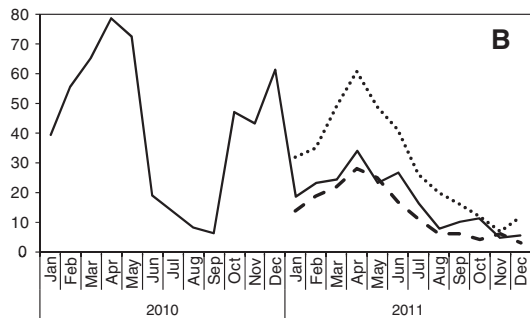

LUANGWA DISTRICT

PROPORTION OF CATCHMENT POPULATION TESTED (%)

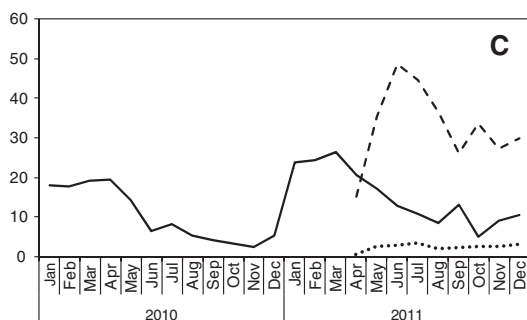

PROPORTION DIAGNOSED AMONG POPULATION TESTED (%)

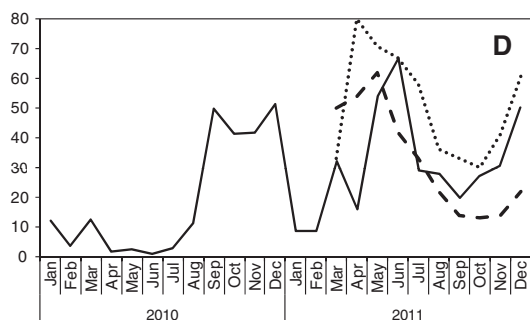

NYMBA DISTRICT

TIME (Calendar month)
